# Supplementary material for: Impact of Argemone mexicana L. on tomato plants infected with Phytophthora infestans
Source: PeerJ. 2024 Jan 3;12:e16666. doi: 10.7717/peerj.16666 (PMC10771083; doi:10.7717/peerj.16666)
Supplement: Supplemental Information 1 [file peerj-12-16666-s001.xlsx]

## Sheet: P. infestans
Treatment	Block	Week
		1	3	5	7	9
Control	1	0	0	0	0	0
Control	2	0	0	0	0	0
Control	3	0	0	0	0	0
Control	4	0	0	0	0	0
Control	5	0	0	0	0	0
EXAm	1	0	0	0	0	0
EXAm	2	0	0	0	0	0
EXAm	3	0	0	0	0	0
EXAm	4	0	0	0	0	0
EXAm	5	0	0	0	0	0
Infes+EXAm	1	0	40	40	40	40
Infes+EXAm	2	0	13	13	13	40
Infes+EXAm	3	0	7	7	10	40
Infes+EXAm	4	0	27	40	40	40
Infes+EXAm	5	7	10	40	40	53
Infes+Captan	1	7	10	10	10	20
Infes+Captan	2	0	10	10	10	10
Infes+Captan	3	0	10	10	10	40
Infes+Captan	4	0	0	0	0	10
Infes+Captan	5	0	0	0	0	27
Infes	1	10	90	90	90	90
Infes	2	13.33	90	90	90	90
Infes	3	26.67	90	90	90	90
Infes	4	10	90	90	90	90
Infes	5	10	26.67	90	90	90

## Sheet: Agronomic
Fruit yield										Number of fruit										Average fruit weigth					Treatment	Block	Stem diameter	Aereal dry weight	Root dry weight
Treatment	Repetition	cluster 1	cluster 2	cluster 3	cluster 4	cluster 5	cluster 6	Total		Treatment	Repetition	cluster 1	cluster 2	cluster 3	cluster 4	cluster 5	cluster 6	Total		Treatment	Fruits	Average weight	average weight of fruits		Control	1	18.3533	669	182
Control	1	556.9	1239.9	1138.6	0	799.3	620.4	4355.1		Control	1	4	10	8	0	7	4	33		Control	36	4673.8	129.828		Control	2	20.5733	611	274
Control	2	0	850.9	928.5	0	1209.6	692	3681		Control	2	0	7	10	0	8	6	31		Control	31	3681	118.742		Control	3	19.8933	537	227
Control	3	604.4	1377	760.1	0	545.4	112.3	3399.2		Control	3	6	10	8	0	5	1	30		Control	31	3465.9	111.803		Control	4	20.3967	1275	364
Control	1	435.2	1291.82	828.9	916	0	0	3471.92		Control	1	4	10	5	6	0	0	25		Control	26	3471.92	133.535		Control	5	21.8533	811	363
Control	2	374.1	1233.2	2649.9	815.1	261.3	0	5333.6		Control	2	4	10	6	6	3	0	29		Control	29	5434.6	187.4		EXAm	1	21.9167	1135	310
Control	3	629.7	1219.97	1237.9	0	982.2	0	4069.77		Control	3	6	10	9	0	9	0	34		Control	34	4069.77	119.699		EXAm	2	21.4133	694	237
Control	1	771.3	1261.09	1100.1	946.7	433.5	0	4512.69		Control	1	7	11	8	6	3	0	35		Control	35	4512.69	128.934		EXAm	3	21.4767	588	296
Control	2	906.5	1138.2	0	764.6	792.4	0	3601.7		Control	2	8	8	0	6	7	0	29		Control	38	4998.8	131.547		EXAm	4	22.3367	931	260
Control	3	919.4	977.4	889.8	960	684.4	0	4431		Control	3	7	9	5	6	7	0	34		Control	34	4431	130.324		EXAm	5	22.03	895	398
Control	1	827.3	903.7	1050.3	371.9	732.1	0	3885.3		Control	1	7	9	6	2	5	0	29		Control	29	3885.3	133.976		Infes	1	14.9767	805	237
Control	2	897.2	885.8	712.4	0	874.8	555.4	3925.6		Control	2	7	9	6	0	7	4	33		Control	33	3925.6	118.958		Infes	2	17.5333	694	237
Control	3	867	935.8	0	0	804.2	455.1	3062.1		Control	3	8	8	0	0	7	4	27		Control	27	3062.1	113.411		Infes	3	17.68	810	247
Control	1	815.8	560.4	1095	777	0	769.6	4017.8		Control	1	7	4	8	6	0	4	29		Control	29	4017.8	138.545		Infes	4	16.8167	823	457
Control	2	953.8	864.6	1155.3	771	680.7	0	4425.4		Control	2	7	9	8	6	5	0	35		Control	35	4425.4	126.44		Infes	5	16.5267	1038	282
Control	3	942.9	1004	1107	461	1089.86	522.7	5127.46		Control	3	10	7	8	6	7	4	42		Control	42	5127.46	122.082		Infes+EXAm	1	17.5967	775	251
EXAm	1	628.2	1992.4	965.2	645.8	756.8	911.7	5900.1		EXAm	1	4	17	7	7	5	7	47		EXAm	47	5900.1	125.534		Infes+EXAm	2	19.6	922	221
EXAm	2	1023.3	1116.2	906.3	742	279.4	744.74	4811.94		EXAm	2	7	8	5	6	2	7	35		EXAm	35	4811.94	137.484		Infes+EXAm	3	19.31	818	325
EXAm	3	794.8	703.8	1123.5	871	836.2	0	4329.3		EXAm	3	7	4	8	6	4	0	29		EXAm	29	4329.3	149.286		Infes+EXAm	4	19.57	763	304
EXAm	1	697.5	1259.3	1211.1	1006	331.7	0	4505.6		EXAm	1	5	11	7	6	2	0	31		EXAm	31	4505.6	145.342		Infes+EXAm	5	20.7667	1038	333
EXAm	2	621.2	1395.2	1719.1	947	0	252.4	4934.9		EXAm	2	4	11	11	6	0	3	35		EXAm	35	4934.9	140.997		Infes+Captan	1	12.79	775	251
EXAm	3	1192	1017.9	1160.1	796	1158.8	614.3	5939.1		EXAm	3	5	8	8	6	10	5	42		EXAm	42	5939.1	141.407		Infes+Captan	2	18.7767	878	237
EXAm	1	924.1	872.6	1362.2	816	0	605	4579.9		EXAm	1	7	8	8	6	0	5	34		EXAm	34	4579.9	134.703		Infes+Captan	3	16.9133	810	243
EXAm	2	1138.2	846.5	1328.6	892	412	786.6	5403.9		EXAm	2	7	7	10	6	2	8	40		EXAm	40	5403.9	135.098		Infes+Captan	4	20.0433	834	334
EXAm	3	1039.3	1140.1	1165.9	970	2037.4	0	6352.7		EXAm	3	7	6	8	6	9	0	36		EXAm	36	6352.7	176.464		Infes+Captan	5	18.6333	1438	424
EXAm	1	1192.2	1012	1079.8	1029	821.4	0	5134.4		EXAm	1	7	9	6	7	6	0	35		EXAm	35	5134.4	146.697
EXAm	2	1046.9	1041.8	1181.2	891	1075.8	994.5	6231.2		EXAm	2	7	8	7	6	10	8	46		EXAm	46	6231.2	135.461
EXAm	3	1078.1	1010.7	1078.41	1204	750.9	497.8	5619.91		EXAm	3	8	9	9	6	5	4	41		EXAm	41	5619.91	137.071
EXAm	1	1181.8	1187.1	961.1	824	1031	264.3	5449.3		EXAm	1	8	8	6	6	5	2	35		EXAm	35	5449.3	155.694
EXAm	2	1372.3	1544	1115.6	986	1178.9	278.3	6475.1		EXAm	2	8	13	7	6	7	2	43		EXAm	43	6475.1	150.584
EXAm	3	894.1	1050.3	1359	883	1110	347.9	5644.3		EXAm	3	7	9	9	6	9	3	43		EXAm	43	5644.3	131.263
Infes	1	916.8	931.2	782.1	807.3	441.7	0	3879.1		Infes	1	7	7	7	7	2	0	30		Infes	30	3879.1	129.303
Infes	2	717.1	1684.6	914.3	789	243.6	0	4348.6		Infes	2	6	13	8	6	2	0	35		Infes	35	4348.6	124.246
Infes	3	595.5	1033	1596.8	939.4	0	0	4164.7		Infes	3	4	9	11	6	0	0	30		Infes	30	4164.7	138.823
Infes	1	741.2	1273.2	1637.8	836	0	0	4488.2		Infes	1	6	10	12	0	0	0	28		Infes	28	4488.2	160.293
Infes	2	761.8	1037.6	985.9	0	233.2	0	3018.5		Infes	2	7	8	11	8	2	0	36		Infes	36	3018.5	83.8472
Infes	3	784.9	430.6	1272.2	1101.5	359.3	0	3948.5		Infes	3	6	5	7	8	3	0	29		Infes	29	3948.5	136.155
Infes	1	672.2	812.8	756.6	614	169.4	0	3025		Infes	1	6	7	4	6	2	0	25		Infes	25	3025	121
Infes	2	940.9	1158	783.9	872	276.6	0	4031.4		Infes	2	9	10	5	6	2	0	32		Infes	32	4031.4	125.981
Infes	3	913.2	942.4	873.3	487	0	0	3215.9		Infes	3	8	9	8	3	0	0	28		Infes	28	3215.9	114.854
Infes	1	986.5	817.6	703	832	0	0	3339.1		Infes	1	9	8	5	6	0	0	28		Infes	28	3339.1	119.254
Infes	2	852.6	908.2	732.6	631	0	0	3124.4		Infes	2	6	8	4	6	0	0	24		Infes	24	3124.4	130.183
Infes	3	737.8	1069.5	1260.8	0	314.1	0	3382.2		Infes	3	7	8	5	0	3	0	23		Infes	23	3382.2	147.052
Infes	1	837.3	1281.6	1250.5	975	0	0	4344.4		Infes	1	7	10	8	6	0	0	31		Infes	31	4344.4	140.142
Infes	2	467.9	1583.6	782.4	652	269.7	0	3755.6		Infes	2	4	12	6	6	2	0	30		Infes	30	3755.6	125.187
Infes	3	815.4	1100.2	693.8	730	224.9	0	3564.3		Infes	3	7	11	6	6	2	0	32		Infes	32	3564.3	111.384
Infes+EXAm	1	819	1103.9	989.4	1081.6	892.1	971.8	5857.8		Infes+EXAm	1	6	8	6	7	8	9	44		Infes+EXAm	44	5857.8	133.132
Infes+EXAm	2	613.7	803.4	665.28	819.1	2621	756.6	6279.08		Infes+EXAm	2	5	7	6	6	6	7	37		Infes+EXAm	37	6279.08	169.705
Infes+EXAm	3	865.2	1135.2	486.2	884.1	605.5	499.5	4475.7		Infes+EXAm	3	7	8	4	6	5	3	33		Infes+EXAm	33	4475.7	135.627
Infes+EXAm	1	596.7	1311.6	1067.1	1446.9	353.5	485.4	5261.2		Infes+EXAm	1	5	12	6	9	3	3	38		Infes+EXAm	38	5261.2	138.453
Infes+EXAm	2	484.5	932	885.8	696	593.8	446.9	4039		Infes+EXAm	2	5	7	6	6	6	3	33		Infes+EXAm	33	4039	122.394
Infes+EXAm	3	752.7	1087.5	913.4	487	969	240.4	4450		Infes+EXAm	3	6	10	8	6	11	2	43		Infes+EXAm	43	4450	103.488
Infes+EXAm	1	362	1717	1179.23	946.4	0	63.6	4268.23		Infes+EXAm	1	4	7	9	6	0	1	27		Infes+EXAm	27	4268.23	158.083
Infes+EXAm	2	752.7	1119.1	1400	2797.8	362.3	336.9	6768.8		Infes+EXAm	2	7	8	11	6	3	2	37		Infes+EXAm	37	6768.8	182.941
Infes+EXAm	3	666.8	1060.2	405.1	553	283	465.2	3433.3		Infes+EXAm	3	5	7	8	6	2	5	33		Infes+EXAm	33	3433.3	104.039
Infes+EXAm	1	541.2	1085.14	686.1	806	0	529.2	3647.65		Infes+EXAm	1	6	8	5	6	0	4	29		Infes+EXAm	29	3647.65	125.781
Infes+EXAm	2	800.5	829.6	793.9	675	0	333.3	3432.3		Infes+EXAm	2	6	7	6	6	0	2	27		Infes+EXAm	27	3432.3	127.122
Infes+EXAm	3	561.112	476.1	898	682	589.21	275.2	3481.62		Infes+EXAm	3	6	4	6	6	5	3	30		Infes+EXAm	30	3481.62	116.054
Infes+EXAm	1	1098.2	850.3	898.1	914.6	615.2	1075.4	5451.8		Infes+EXAm	1	9	10	6	6	5	7	43		Infes+EXAm	43	5451.8	126.786
Infes+EXAm	2	964.7	1026.1	1294.2	699.7	637.4	262.7	4884.8		Infes+EXAm	2	8	8	8	6	8	3	41		Infes+EXAm	41	4884.8	119.141
Infes+EXAm	3	739.5	1669	1124.4	598	525.7	317.6	4974.2		Infes+EXAm	3	7	9	6	6	5	4	37		Infes+EXAm	37	4974.2	134.438
Infes+Captan	1	388.7	1249.9	1312.9	937	0	613	4501.5		Infes+Captan	1	5	10	9	7	0	5	36		Infes+Captan	36	4501.5	125.042
Infes+Captan	2	841.2	0	1346.4	695	508.5	468.2	3859.3		Infes+Captan	2	7	0	9	6	5	5	32		Infes+Captan	32	3859.3	120.603
Infes+Captan	3	0	993.4	0	752	569	0	2314.4		Infes+Captan	3	0	7	0	6	6	0	19		Infes+Captan	19	2314.4	121.811
Infes+Captan	1	869.2	1064.3	2781.2	648	355.9	254.5	5973.1		Infes+Captan	1	7	8	7	6	5	3	36		Infes+Captan	36	5973.1	165.919
Infes+Captan	2	207.1	935.3	1096	942	571.31	0	3751.71		Infes+Captan	2	2	8	8	6	5	0	29		Infes+Captan	29	3751.71	129.369
Infes+Captan	3	851.5	630.4	1572.8	916	1478.4	0	5449.1		Infes+Captan	3	8	6	9	6	14	0	43		Infes+Captan	43	5449.1	126.723
Infes+Captan	1	434.1	1112.2	1007.41	697	0	0	3250.71		Infes+Captan	1	4	9	8	6	0	0	27		Infes+Captan	27	3250.71	120.397
Infes+Captan	2	820	1218.8	1335.8	699	0	0	4073.6		Infes+Captan	2	7	9	8	6	0	0	30		Infes+Captan	30	4073.6	135.787
Infes+Captan	3	1005	1004.8	0	820	0	0	2829.8		Infes+Captan	3	9	8	0	6	0	0	23		Infes+Captan	23	2829.8	123.035
Infes+Captan	1	841.5	963.5	904	603	1014.6	279.2	4605.8		Infes+Captan	1	8	9	6	6	7	2	38		Infes+Captan	38	4605.8	121.205
Infes+Captan	2	1096.3	1009.4	0	583	1000.1	439.3	4128.1		Infes+Captan	2	8	9	0	6	9	3	35		Infes+Captan	35	4128.1	117.946
Infes+Captan	3	834.1	380.55	0	410	861	382.7	2868.35		Infes+Captan	3	6	8	0	6	6	3	29		Infes+Captan	29	2868.35	98.9086
Infes+Captan	1	1047.1	1124.8	1124.2	547	208.8	0	4051.9		Infes+Captan	1	9	9	7	6	2	0	33		Infes+Captan	33	4051.9	122.785
Infes+Captan	2	911.1	1370.8	2627.3	884	674	549.8	7017		Infes+Captan	2	7	11	6	6	5	4	39		Infes+Captan	39	7017	179.923
Infes+Captan	3	832.8	843	875.7	889	684.3	194.5	4319.3		Infes+Captan	3	7	3	6	6	5	2	29		Infes+Captan	29	4319.3	148.941

## Sheet: Biomarkers
Day	Treatment	Block	Samples	H202	MDA	Superoxide anion
45	EXAm	1	1	1.70183	48.9316	2.80414
45	EXAm	2	2	1.82114	44.8418	2.97068
45	EXAm	3	3	1.87227	46.5946	2.95878
45	EXAm	4	4	1.10529	43.3812	2.95878
45	EXAm	5	5	1.13938	37.1004	2.8993
45	Infes+EXAm	1	6	1.75297	58.864	3.61302
45	Infes+EXAm	2	7	2.91196	61.9314	3.96987
45	Infes+EXAm	3	8	2.77561	25.8534	3.56544
45	Infes+EXAm	4	9	2.60517	46.3025	3.57733
45	Infes+EXAm	5	10	1.39504	53.1675	3.60112
45	Infes+Captan	1	11	1.88932	56.673	5.3854
45	Infes+Captan	2	12	1.59957	67.7739	4.42189
45	Infes+Captan	3	13	1.78705	99.4699	4.77875
45	Infes+Captan	4	14	1.27573	47.617	5.24266
45	Infes+Captan	5	15	2.46881	49.0777	4.71927
45	Infes	1	16	1.82114	66.1672	4.58842
45	Infes	2	17	3.11649	59.4483	4.55274
45	Infes	3	18	2.99718	38.561	4.65979
45	Infes	4	19	2.57108	58.5719	5.3854
45	Infes	5	20	2.26429	60.4707	5.50435
45	Control	1	21	2.0768	91.1443	4.27915
45	Control	2	22	3.15057	76.3917	3.50596
45	Control	3	23	2.69039	56.2348	3.95798
45	Control	4	24	2.16202	61.6392	3.57733
45	Control	5	25	1.92341	53.6057	4.04124
60	EXAm	1	26	0.83259	63.392	3.17289
60	EXAm	2	27	0.525798	68.9425	3.29185
60	EXAm	3	28	0.49171	46.4485	3.01826
60	EXAm	4	29	0.57693	25.5613	3.24426
60	EXAm	5	30	0.611018	29.7972	2.86362
60	Infes+EXAm	1	31	2.5029	94.7959	3.95798
60	Infes+EXAm	2	32	1.78705	59.7404	3.88661
60	Infes+EXAm	3	33	1.07121	66.8975	3.70818
60	Infes+EXAm	4	34	1.17347	48.7855	4.07693
60	Infes+EXAm	5	35	0.49171	49.5159	4.02935
60	Infes+Captan	1	36	1.34391	75.6614	4.45758
60	Infes+Captan	2	37	0.49171	59.5943	4.10072
60	Infes+Captan	3	38	0.66215	35.7858	4.3981
60	Infes+Captan	4	39	0.66215	56.0888	3.68439
60	Infes+Captan	5	40	0.49171	61.3471	3.44648
60	Infes	1	41	1.2246	109.11	4.3981
60	Infes	2	42	1.03712	81.3579	3.87471
60	Infes	3	43	0.764414	46.0103	3.3989
60	Infes	4	44	1.10529	47.1788	3.61302
60	Infes	5	45	0.934854	64.7066	3.47027
60	Control	1	46	0.525798	51.2686	3.07773
60	Control	2	47	0.781458	36.5161	3.12531
60	Control	3	48	0.628062	50.1001	3.00636
60	Control	4	49	0.49171	48.0552	3.24426
60	Control	5	50	0.628062	53.0214	3.00636
75	EXAm	1	51	0.457622	62.0774	3.31564
75	EXAm	2	52	0.49171	51.7068	3.12531
75	EXAm	3	53	0.57693	84.1332	3.24426
75	EXAm	4	54	0.457622	80.7737	3.29185
75	EXAm	5	55	0.457622	75.0772	3.11342
75	Infes+EXAm	1	56	0.900766	70.257	2.97068
75	Infes+EXAm	2	57	0.91781	72.0098	2.81604
75	Infes+EXAm	3	58	0.713282	75.9535	3.24426
75	Infes+EXAm	4	59	0.559886	31.5499	3.3989
75	Infes+EXAm	5	60	0.593974	61.3471	3.23237
75	Infes+Captan	1	61	0.457622	100.638	2.6614
75	Infes+Captan	2	62	0.764414	69.9649	2.83983
75	Infes+Captan	3	63	0.372402	52.8754	2.79225
75	Infes+Captan	4	64	0.457622	53.8978	3.29185
75	Infes+Captan	5	65	0.593974	31.1117	3.37511
75	Infes	1	66	1.13938	44.9879	5.02855
75	Infes	2	67	1.05416	96.5486	4.24346
75	Infes	3	68	0.883722	40.8981	4.43379
75	Infes	4	69	1.05416	54.4821	4.43379
75	Infes	5	70	0.764414	63.6841	4.31483
75	Control	1	71	0.49171	75.5154	3.60112
75	Control	2	72	0.525798	43.9654	4.19588
75	Control	3	73	0.645106	47.471	3.42269
75	Control	4	74	0.423534	75.8075	3.24426
75	Control	5	75	0.611018	82.3804	3.45838
90	EXAm	1	76	0.525798	76.3917	3.31564
90	EXAm	2	77	0.934854	67.7739	3.36322
90	EXAm	3	78	0.559886	50.9765	3.36322
90	EXAm	4	79	0.40649	75.9535	3.50596
90	EXAm	5	80	0.798502	52.2911	2.9112
90	Infes+EXAm	1	81	0.815546	74.2008	2.99447
90	Infes+EXAm	2	82	0.83259	28.0444	2.94688
90	Infes+EXAm	3	83	0.66215	83.2568	3.00636
90	Infes+EXAm	4	84	0.49171	41.6284	3.00636
90	Infes+EXAm	5	85	0.645106	52.7293	2.94688
90	Infes+Captan	1	86	0.474666	78.2906	4.13641
90	Infes+Captan	2	87	0.389446	72.8862	4.11261
90	Infes+Captan	3	88	0.457622	70.8413	4.1483
90	Infes+Captan	4	89	0.525798	52.2911	3.95798
90	Infes+Captan	5	90	0.628062	105.605	3.79144
90	Infes	1	91	0.781458	79.313	4.31483
90	Infes	2	92	0.83259	50.5383	4.45758
90	Infes	3	93	0.934854	40.752	4.19588
90	Infes	4	94	0.815546	46.5946	4.3862
90	Infes	5	95	0.83259	49.2237	4.1602
90	Control	1	96	0.389446	57.2573	3.27995
90	Control	2	97	0.645106	85.7399	2.97068
90	Control	3	98	0.628062	98.0093	2.97068
90	Control	4	99	0.611018	91.5825	2.87551
90	Control	5	100	0.645106	82.6725	3.24426
105	EXAm	1	101	0.883722	58.5719	3.10152
105	EXAm	2	102	1.03712	59.0101	3.03015
105	EXAm	3	103	0.900766	57.9876	3.06584
105	EXAm	4	104	0.508754	53.4596	2.94688
105	EXAm	5	105	0.474666	55.0663	2.8993
105	Infes+EXAm	1	106	0.866678	110.571	3.161
105	Infes+EXAm	2	107	0.798502	109.256	3.36322
105	Infes+EXAm	3	108	0.696238	73.9086	3.19668
105	Infes+EXAm	4	109	0.645106	63.392	3.1491
105	Infes+EXAm	5	110	0.730326	49.9541	3.13721
105	Infes+Captan	1	111	0.440578	83.695	3.00636
105	Infes+Captan	2	112	0.49171	69.0885	3.17289
105	Infes+Captan	3	113	0.542842		3.08963
105	Infes+Captan	4	114	0.628062	120.649	2.94688
105	Infes+Captan	5	115	0.57693	94.3577	3.18479
105	Infes	1	116	1.90636	90.1218	3.161
105	Infes	2	117	1.83819	85.3017	3.3989
105	Infes	3	118	1.59957	69.3806	3.00636
105	Infes	4	119	1.85523	60.1786	2.9112
105	Infes	5	120	1.97454	72.5941	2.97068
105	Control	1	121	0.900766	51.8529	3.69628
105	Control	2	122	0.593974	71.4255	3.56544
105	Control	3	123	0.815546	42.7969	3.3989
105	Control	4	124	0.593974	99.9081	3.33943
105	Control	5	125	0.83259	53.7517	3.19668

## Sheet: Non-enzymatic
Day	Treatment	Block	Samples	Phenols	Flavonoids	Vitamin C	Chlorophyll A	Chlorophyll B	Total chlorophyll	B carotene	Proteins	yellow carotenoids
45	EXAm	1	1	6.53068	618.902	4.11954	9.40856	3.1243	12.5329	8.29389	416.375	84.5359
45	EXAm	2	2	6.5132	666.204	5.54486	8.03434	4.27051	12.3048	1.78176	456.288	38.76
45	EXAm	3	3	6.67931	726.515	5.3155	8.63978	2.0701	10.7099	6.80499	407.909	62.9077
45	EXAm	4	4	5.69139	843.588	5.92167	5.50295	1.06362	6.56657	4.6015	424.842	41.1445
45	EXAm	5	5	7.47488	857.779	4.90592	7.66139	1.39746	9.05885	6.71728	441.774	57.701
45	Infes+EXAm	1	6	6.96781	605.894	5.16805	9.14608	1.92471	11.0708	6.9983	440.565	63.7512
45	Infes+EXAm	2	7	6.70554	682.76	5.24997	10.3936	2.13368	12.5273	8.06077	450.241	72.6939
45	Infes+EXAm	3	8	5.97116	525.48	5.70869	9.95308	2.01421	11.9673	7.72637	430.889	70.0271
45	Infes+EXAm	4	9	5.62145	691.038	4.2506	10.8726	2.40733	13.2799	8.02416	430.889	74.2151
45	Infes+EXAm	5	10	6.26841	715.872	4.57826	9.96998	2.20326	12.1732	7.5287	478.059	69.2991
45	Infes+Captan	1	11	5.65642	439.153	5.9872	4.31284	0.599504	4.91235	4.48141	410.328	36.6195
45	Infes+Captan	2	12	6.11978	524.297	5.85614	4.08701	0.5694	4.65641	4.16506	410.328	34.0935
45	Infes+Captan	3	13	5.97116	387.12	5.00422	5.3721	0.807728	6.17983	5.63286	453.869	45.7968
45	Infes+Captan	4	14	5.17558	505.376	5.29911	4.74176	0.715832	5.45759	4.87866	430.889	39.8984
45	Infes+Captan	5	15	6.0411	441.518	5.24996	5.22943	0.83372	6.06315	5.15779	449.031	43.3021
45	Infes	1	16	3.87293	427.327	6.8555	5.85452	2.21311	8.06763	2.83293	417.585	33.5835
45	Infes	2	17	3.71557	436.788	4.46358	6.25242	1.19981	7.45222	5.31117	458.707	46.3015
45	Infes	3	18	4.00407	380.025	5.54486	6.19489	1.2465	7.44138	5.11014	470.802	45.1738
45	Infes	4	19	4.06527	543.218	5.49571	6.34717	1.25905	7.60622	5.17747	464.754	47.2442
45	Infes	5	20	3.6194	583.425	4.72571	6.16225	1.47962	7.64187	4.61005	421.213	43.1059
45	Control	1	21	6.70554	816.389	6.15103	7.70867	1.60434	9.31301	6.27245	451.45	56.6179
45	Control	2	22	7.29129	687.49	5.28273	6.30278	1.21107	7.51385	5.41149	413.956	47.0899
45	Control	3	23	6.39954	672.117	5.44656	5.75181	1.52402	7.27583	5.31504	479.268	50.1609
45	Control	4	24	7.47488	726.515	4.38167	5.77159	1.17002	6.94161	4.77805	473.221	42.7236
45	Control	5	25	6.06733	545.583	5.23358	6.94005	1.53005	8.4701	5.04694	380.091	49.8929
60	EXAm	1	26	4.93953	966.575	5.23358	6.58563	1.69506	8.28069	4.11162	389.767	39.0385
60	EXAm	2	27	6.72302	1030.43	4.84039	7.07409	1.79879	8.87289	4.36624	382.51	40.9728
60	EXAm	3	28	4.58108	967.757	4.47996	7.90835	2.03224	9.94059	4.9449	381.3	46.1767
60	EXAm	4	29	4.89582	705.229	4.57826	7.97233	2.08074	10.0531	4.94675	390.976	47.5502
60	EXAm	5	30	5.01821	938.193	5.16805	7.74325	1.9683	9.71154	4.90685	542.161	47.1146
60	Infes+EXAm	1	31	3.03364	890.891	4.74209	11.7901	3.6073	15.3974	6.06422	532.485	70.8417
60	Infes+EXAm	2	32	6.06733	896.804	5.43018	13.1792	4.01998	17.1992	6.79485	453.869	79.8581
60	Infes+EXAm	3	33	5.27175	720.602	5.64316	14.0375	4.38453	18.4221	7.11146	545.79	84.6666
60	Infes+EXAm	4	34	3.5582	722.967	5.36465	12.8706	3.9267	16.7973	6.19741	538.533	76.1305
60	Infes+EXAm	5	35	5.80505	765.539	4.84039	16.9937	5.39471	22.3884	8.26586	442.984	100.808
60	Infes+Captan	1	36	2.33424	505.376	5.1189	3.61473	0.807864	4.42259	2.37994	470.802	302.914
60	Infes+Captan	2	37	2.52657	482.908	4.88954	5.23964	1.21262	6.45227	3.24243	478.059	29.5264
60	Infes+Captan	3	38	2.56154	511.289	5.3155	6.19184	1.5116	7.70344	3.87955	452.66	36.2849
60	Infes+Captan	4	39	3.16478	453.344	5.39741	6.77146	1.6688	8.44026	4.37699	453.869	40.0884
60	Infes+Captan	5	40	4.77342	521.932	5.28273	6.61795	1.608	8.22595	4.11455	488.944	38.6737
60	Infes	1	41	4.12647	565.687	6.42954	12.6573	4.16353	16.8209	6.84211	475.64	72.3301
60	Infes	2	42	4.05653	579.877	5.61039	16.5229	5.46588	21.9888	8.7664	485.316	94.1755
60	Infes	3	43	3.98659	533.758	5.75784	20.837	6.7461	27.5831	10.9695	478.059	118.991
60	Infes	4	44	4.17892	745.436	5.83975	15.085	4.87464	19.9596	8.10227	507.086	86.3362
60	Infes	5	45	4.9133	669.752	4.90592	13.7591	4.66359	18.4227	7.17789	464.754	78.2087
60	Control	1	46	4.08276	674.482	5.41379	14.0807	4.45374	18.5345	7.3576	476.849	82.3601
60	Control	2	47	4.51114	612.989	5.33188	20.0283	6.47646	26.5047	10.5231	668.673	120.206
60	Control	3	48	4.38	608.259	4.9223	13.4354	4.0679	17.5033	7.30906	476.849	79.2066
60	Control	4	49	5.26301	616.537	4.97145	19.7823	8.98281	28.7651	5.51168	456.288	94.4871
60	Control	5	50	4.49366	635.458	5.57762	13.1854	4.40019	17.5856	6.4951	24.3828	73.8335
75	EXAm	1	51	6.19847	814.024	5.59401	20.978	7.31142	28.2894	9.90678	634.082	126.615
75	EXAm	2	52	6.81919	903.899	5.62677	19.4152	6.49706	25.9122	9.61715	601.426	122.136
75	EXAm	3	53	7.335	1006.78	4.41443	22.7543	7.6734	30.4277	11.4199	596.588	139.472
75	EXAm	4	54	7.18638	1086.01	4.88954	22.6904	7.69439	30.3848	11.2756	608.683	141.062
75	EXAm	5	55	6.22469	897.986	4.87316	13.3723	5.47866	18.851	6.18611	469.592	179.567
75	Infes+EXAm	1	56	5.89247	538.488	5.38103	13.3723	5.47866	18.851	8.2903	442.984	78.4045
75	Infes+EXAm	2	57	6.22469	604.711	5.29911	17.4524	7.29438	24.7468	10.6649	568.77	103.011
75	Infes+EXAm	3	58	6.81919	602.346	5.65954	25.8516	11.3548	37.2063	18.3392	709.069	239.775
75	Infes+EXAm	4	59	7.16889	708.776	5.70869	15.2025	6.35117	21.5537	8.8527	346.225	84.6028
75	Infes+EXAm	5	60	5.51654	720.602	5.93805	20.9721	8.82154	29.7936	12.1581	346.225	116.47
75	Infes+Captan	1	61	5.36792	601.164	5.92167	12.8073	5.76146	18.5688	4.08272	305.103	65.1599
75	Infes+Captan	2	62	3.9079	750.166	5.36465	11.4799	4.2443	15.7242	5.38016	272.447	67.5748
75	Infes+Captan	3	63	2.64023	745.436	4.90592	12.5488	4.42158	16.9703	6.21037	227.696	75.5658
75	Infes+Captan	4	64	4.19641	830.58	5.23358	18.2796	6.39033	24.67	8.72099	286.961	109.516
75	Infes+Captan	5	65	4.88708	745.436	5.87252	14.0244	6.51558	20.54	4.30886	263.981	72.5573
75	Infes	1	66	2.83256	547.948	5.34826	17.5336	5.91247	23.446	8.91837	255.514	109.018
75	Infes	2	67	5.84002	609.441	5.3155	18.1124	6.01434	24.1267	9.22397	244.629	114.68
75	Infes	3	68	4.77342	666.204	5.16805	18.1124	6.01434	24.1267	9.90739	305.103	117.905
75	Infes	4	69	6.61811	766.722	5.13528	18.7731	6.19355	24.9667	8.75766	226.487	111.566
75	Infes	5	70	5.33295	822.302	5.85614	16.8272	5.70653	22.5338	8.536	319.617	105.478
75	Control	1	71	6.76673	954.749	4.90592	24.1747	8.86119	33.0359	11.8426	250.677	142.143
75	Control	2	72	5.88373	1009.15	4.77486	21.7896	7.87894	29.6686	10.9647	301.475	128.722
75	Control	3	73	6.75799	721.785	4.67656	19.3335	6.90614	26.2396	9.20026	420.004	111.547
75	Control	4	74	6.93284	827.032	4.88954	26.8411	9.86226	36.7034	13.6023	493.782	161.5
75	Control	5	75	6.9241	761.992	4.29975	12.8326	4.60638	17.439	6.7567	509.505	75.8454
90	EXAm	1	76	8.36663	789.191	5.47933	14.6015	5.17237	19.7739	6.79712	426.051	86.7287
90	EXAm	2	77	7.40494	899.169	4.80762	17.4999	6.44478	23.9447	7.02592	491.363	99.8705
90	EXAm	3	78	8.10435	903.899	4.79124	16.9283	6.28496	23.2132	7.17251	527.647	98.229
90	EXAm	4	79	8.26172	860.144	4.93869	15.8519	5.54024	21.3922	7.71594	496.201	94.2329
90	EXAm	5	80	8.30543	990.226	4.64379	17.6544	6.20639	23.8608	8.53162	507.086	108.134
90	Infes+EXAm	1	81	8.10435	764.357	5.51209	13.669	5.01289	18.6819	6.30605	487.735	80.2338
90	Infes+EXAm	2	82	8.60268	821.12	4.72571	18.1427	6.59515	24.7378	7.32051	568.77	101.456
90	Infes+EXAm	3	83	7.98196	845.953	4.69294	23.1179	8.18648	31.3044	10.6181	514.343	134.575
90	Infes+EXAm	4	84	4.29258	981.948	4.70933	19.2975	6.91794	26.2155	9.13085	574.817	115.075
90	Infes+EXAm	5	85	8.35789	966.575	5.13528	18.8231	6.84437	25.6674	8.37018	507.086	109.869
90	Infes+Captan	1	86	3.64563	550.313	4.79124	6.99351	2.74962	9.74312	2.75184	374.043	38.3736
90	Infes+Captan	2	87	3.60191	743.071	4.36528	11.2142	3.66433	14.8785	5.69984	365.577	67.8387
90	Infes+Captan	3	88	5.8575	661.474	4.70933	12.3975	4.04034	16.4378	6.46125	423.632	75.2295
90	Infes+Captan	4	89	5.75259	646.101	4.38167	10.6985	3.41665	14.1151	6.41283	424.842	69.9805
90	Infes+Captan	5	90	5.28049	694.586	5.26635	9.65422	3.57186	13.2261	4.39411	432.099	57.6682
90	Infes	1	91	6.0411	525.48	5.46294	14.2188	4.72118	18.94	7.02064	455.079	88.4237
90	Infes	2	92	5.82253	611.807	4.74209	13.3437	4.37603	17.7197	6.50528	434.517	82.293
90	Infes	3	93	5.26301	612.989	4.95507	15.8349	5.21221	21.0472	7.72422	386.138	97.9045
90	Infes	4	94	5.02696	652.014	5.82337	13.7934	4.54113	18.3345	6.81027	416.375	85.2813
90	Infes	5	95	4.93079	721.785	3.84103	16.3426	5.32354	21.6661	8.00496	446.612	101.214
90	Control	1	96	6.09355	785.643	5.62677	8.96722	2.9495	11.9167	9.27747	473.221	53.0663
90	Control	2	97	6.12852	955.932	4.31613	19.6905	6.34412	26.0346	9.1697	438.146	116.328
90	Control	3	98	6.30338	753.714	4.33252	13.7798	4.5039	18.2837	6.73034	435.727	82.7685
90	Control	4	99	6.18972	805.746	6.15103	16.5093	5.42865	21.938	8.53421	465.964	115.213
90	Control	5	100	7.05524	734.793	5.33188	17.3953	5.93007	23.3254	8.27123	436.936	104.667
105	EXAm	1	101	7.29129	559.774	4.95507	11.0934	3.4399	14.5333	6.26656	539.742	64.2098
105	EXAm	2	102	7.335	720.602	4.2506	14.4604	4.46808	18.9285	8.09981	488.944	84.5431
105	EXAm	3	103	6.72302	525.48	5.7906	12.2942	3.78234	16.0765	6.93491	488.944	70.3697
105	EXAm	4	104	7.73716	845.953	4.33252	14.7443	4.58339	19.3277	8.09933	583.284	84.9475
105	EXAm	5	105	7.14267	849.501	2.92358	17.2782	5.2874	22.5656	9.62554	482.897	100.765
105	Infes+EXAm	1	106	5.61271	659.109	4.74209	9.88056	2.39942	12.28	5.56896	520.391	55.8696
105	Infes+EXAm	2	107	6.99404	715.872	4.66018	10.2626	3.00375	13.2664	5.83661	416.375	63.8719
105	Infes+EXAm	3	108	7.18638	601.164	5.06975	10.492	3.03962	13.5317	6.00659	519.181	72.6982
105	Infes+EXAm	4	109	6.58314	609.441	4.87316	11.228	3.27755	14.5055	6.31811	481.687	68.9396
105	Infes+EXAm	5	110	7.17764	754.896	5.28273	11.5158	3.39155	14.9074	6.70342	458.707	72.2785
105	Infes+Captan	1	111	6.96781	510.106	5.26635	10.8577	3.02381	13.8815	7.22918	502.248	72.3991
105	Infes+Captan	2	112	5.80505	564.504	4.67656	11.0784	3.14595	14.2244	6.45693	452.66	68.0731
105	Infes+Captan	3	113	6.8017	530.21	4.85677	10.5324	3.01942	13.5518	6.14304	459.917	65.2098
105	Infes+Captan	4	114	7.43991	553.861	5.29911	10.3437	3.02576	13.3695	5.97926	459.917	64.3521
105	Infes+Captan	5	115	7.30003	603.529	5.16805	11.2128	3.26864	14.4814	6.42448	494.991	68.8526
105	Infes	1	116	4.34503	469.899	7.15039	8.3654	2.41734	10.7827	4.84598	472.011	52.2714
105	Infes	2	117	5.70888	476.995	4.52911	9.84567	2.88349	12.7292	5.66237	445.403	61.5803
105	Infes	3	118	5.89247	441.518	5.34826	9.84567	2.88349	12.7292	6.33133	456.288	66.0783
105	Infes	4	119	5.83128	354.008	4.41443	7.84961	4.83852	12.6881	5.11386	435.727	74.4069
105	Infes	5	120	5.84876	278.325	5.47933	10.9395	3.38618	14.3256	6.05219	505.877	67.9188
105	Control	1	121	5.71762	717.054	5.83975	15.004	5.20007	20.2041	7.8481	658.271	94.1634
105	Control	2	122	6.85416	738.34	5.83975	20.625	7.23965	27.8647	10.4044	629.244	129.101
105	Control	3	123	6.01487	871.97	5.16805	22.0912	7.60616	29.6974	9.48035	630.453	139.741
105	Control	4	124	6.49571	674.482	4.80762	18.4099	6.37535	24.7853	9.40912	690.927	115.099
105	Control	5	125	5.49031	603.529	4.97145	19.8679	7.02952	26.8974	10.3199	652.224	125.393
